# Supplementary material for: Feedback, Lineages and Self-Organizing Morphogenesis
Source: PLOS journal article supplement (doi:10.1371/journal.pcbi.1004814), 2016-03-18

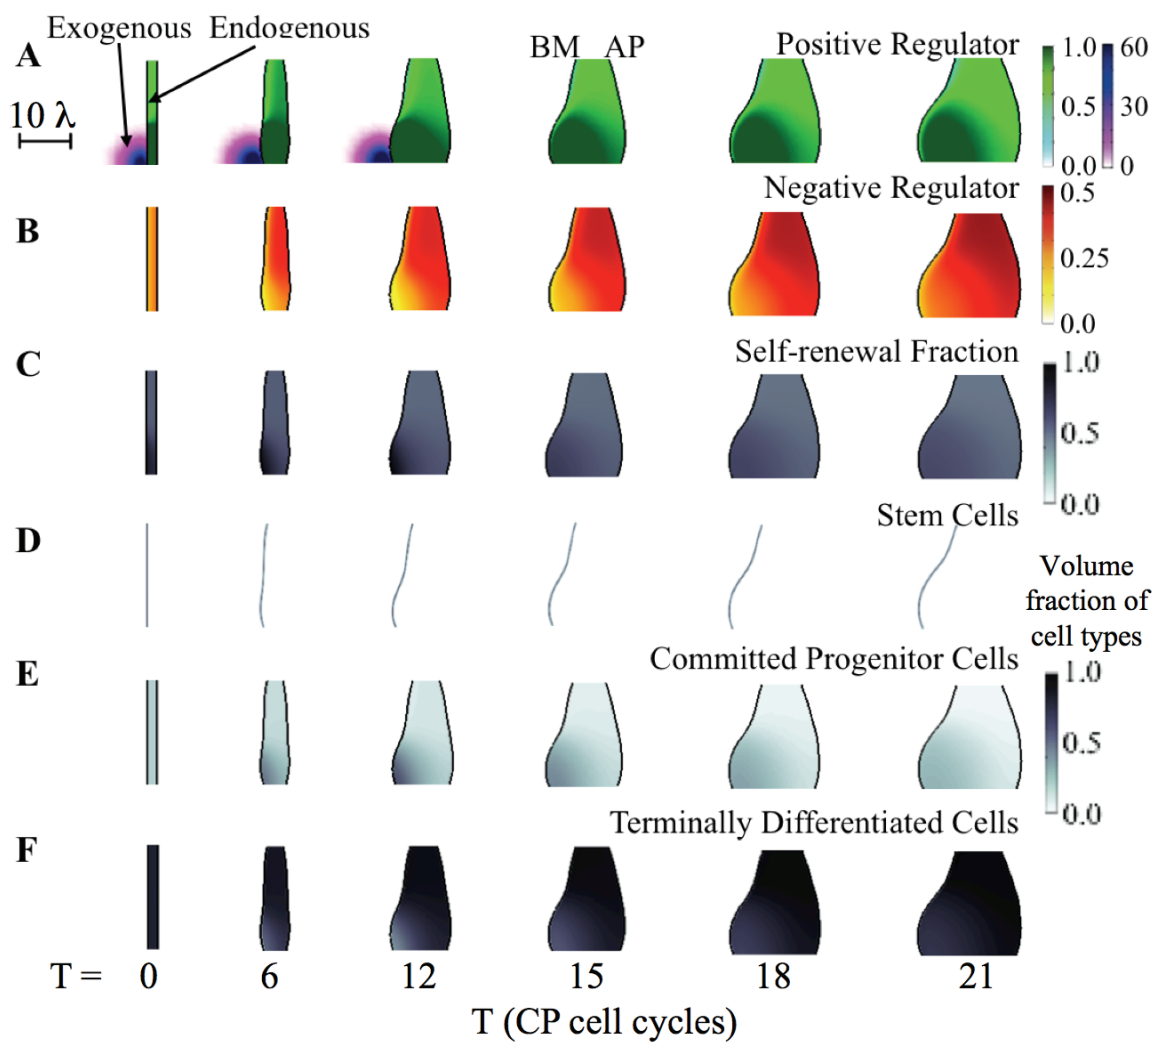

Supplement: S11 (10.1371/journal.pcbi.1004814.s011) [file journal.pcbi.1004814.s011]
